1 **Timely sleep coupling: spindle-slow wave synchrony is linked to**  
2 **early amyloid- $\beta$  burden and predicts memory decline**

3 Daphne Chylinski<sup>1</sup>, Maxime Van Egroo<sup>1</sup>, Justinas Narbutas<sup>1,2</sup>, Vincenzo Muto<sup>1</sup>, Mohamed A. Bahri<sup>1</sup>,  
4 Christian Berthomier<sup>3</sup>, Eric Salmon<sup>1,2,4</sup>, Christine Bastin<sup>1,2</sup>, Christophe Phillips<sup>1,5</sup>, Fabienne Collette<sup>1,2</sup>,  
5 Pierre Maquet<sup>1,4</sup>, Julie Carrier<sup>6</sup>, Jean Marc Lina<sup>6</sup>, & Gilles Vandewalle<sup>1\*</sup>

6

7 <sup>1</sup> GIGA-Cyclotron Research Centre-In Vivo Imaging, University of Liège, Liège, Belgium.

8 <sup>2</sup> Psychology and Cognitive Neuroscience Research Unit, University of Liège, Liège, Belgium.

9 <sup>3</sup> Physip SA, Paris, France.

10 <sup>4</sup> Department of Neurology, University Hospital of Liège, Liège, Belgium.

11 <sup>5</sup> GIGA-In Silico Medicine, University of Liège, Liège, Belgium.

12 <sup>6</sup> Centre for Advanced Research in Sleep Medicine, CIUSSS-NÎM – Hôpital du Sacré-Coeur de  
13 Montréal, Montreal, QC, Canada

14

15 Corresponding author: Gilles Vandewalle, GIGA-Cyclotron Research Centre-In Vivo Imaging,

16 Bâtiment B30, Allée du Six Août, 8, 4000 Liège, Belgium

17 Email: gilles.vandewalle@uliege.be.; Tel: +32 4 366 2316

18 **ABSTRACT**

19 Sleep alteration is a hallmark of ageing and emerges as a risk factor for Alzheimer's disease (AD). While  
20 the fine-tuned coalescence of sleep microstructure elements may influence age-related cognitive  
21 trajectories, its association with AD processes is not fully established. Here, we investigated whether  
22 the coupling of spindles and slow waves is associated with early amyloid-beta (A $\beta$ ) brain burden, a  
23 hallmark of AD neuropathology, and cognitive change over 2 years in 100 healthy individuals in late-  
24 midlife (50-70y; 68 women). We found that, in contrast to other sleep metrics, earlier occurrence of  
25 spindles on slow-depolarisation slow waves is associated with higher medial prefrontal cortex A $\beta$   
26 burden ( $p=0.014$ ,  $r^2_{\beta^*}=0.06$ ), and is predictive of greater longitudinal memory decline ( $p=0.032$ ,  
27  $r^2_{\beta^*}=0.07$ ). These findings unravel early links between sleep, AD-related processes and cognition and  
28 suggest that altered coupling of sleep microstructure elements, key to its mnemonic function, contributes to  
29 poorer brain and cognitive trajectories in ageing.

## 30 INTRODUCTION

31 Alterations in sleep quality are typical of the ageing process with a more fragmented and less  
32 intense (or shallower) sleep detected as early as the fifth decade of life<sup>1</sup>. Beyond healthy ageing,  
33 alterations in sleep are predictive of the risk of developing Alzheimer's disease (AD) over the next 5 to  
34 10 years<sup>2,3</sup>. Similarly, sleep disorders such as insomnia and obstructive sleep apnoea syndrome are  
35 associated with increased odds for AD diagnosis<sup>4,5</sup>. Brain burdens of aggregated amyloid- $\beta$  (A $\beta$ ) and  
36 tau proteins, hallmarks of AD pathophysiology, have been linked with a reduced sleep intensity, as  
37 indexed by the overall production of slow waves during sleep, but also to worse objective sleep  
38 efficiency and subjective sleep quality, in healthy and cognitively normal older individuals aged > 70y<sup>6-</sup>  
39 <sup>11</sup>. Sleep alteration may in turn contribute to the aggregation of AD proteins: experimental sleep  
40 deprivation and sleep fragmentation (disturbance in the production of slow wave during sleep) lead to  
41 increased concentration of A $\beta$  in the cerebrospinal fluid (CSF), both in animal models and in healthy  
42 human populations<sup>7,9,12,13</sup>. Overall, a bidirectional detrimental relationship between sleep quality and the  
43 neuropathology of AD is emerging in the literature. Sleep may therefore constitute a modifiable risk  
44 factor which one could act upon to prevent or delay the neuropathological processes associated to AD  
45 and favour successful cognitive trajectories over the lifespan<sup>14-16</sup>. Hitherto, however, sleep is not yet  
46 widely recognised as an independent risk factor for AD and the mechanistic associations between sleep  
47 and early AD neuropathology are not yet fully established.

48 Sleep microstructure elements, such as sleep spindles and slow waves (SW), are essential  
49 correlates of cognitive function of sleep, as higher densities of both elements during post-learning sleep  
50 have been linked to a better overnight memory consolidation<sup>17-21</sup>. Furthermore, SW activity (i.e. a power  
51 measure combining the density and amplitude of sleep SW over sleep cycles in the 0.75 to 4 Hz band)  
52 was reported to modulate the regression between prefrontal cortex A $\beta$  burden and a lower overnight  
53 memory consolidation in cognitively normal older individuals<sup>6</sup>. The fine-tuned coupling of spindles and  
54 SW has further been reported to be altered in ageing, with an earlier occurrence of the spindle relative  
55 to the SW depolarisation phase in the older compared to younger individuals, and to predict overnight  
56 memory retention<sup>22</sup>. Whether this spindle-SW coupling in ageing is associated to AD-pathological

57 processes and cognitive trajectories is not fully established, however. A study in 31 individuals, aged  
58 around 75y, found a link between the brain deposit of tau protein and the coupling of spindles and SW<sup>23</sup>.  
59 By contrast, another research failed to find a link between this coupling and A $\beta$  brain burden<sup>24</sup>. Here,  
60 we argue that, on top of potential statistical power issues, the difficulty to detect this link may be due to  
61 the fact that the assessments were carried out late over the lifespan (i.e. > 70y), when subtle associations  
62 may be masked by concurrent brain alterations, and by the heterogeneity of sleep SW.

63 The low frequency oscillations of the electroencephalography (EEG) have been divided in slow  
64 oscillations ( $\leq 1$  Hz) and delta waves (1-4 Hz) for decades in humans, notably based on the theoretical  
65 framework of the generation of SW<sup>25-27</sup>. As one of the main features of the SW resides in their transition  
66 from down- to up-state, reflecting synchronised depolarisation, a recent work proposed the transition  
67 frequency of the down-to-up state as a way of distinguishing between *slow* and *fast* switcher SWs<sup>28</sup>.  
68 Compared to young adults, on top of exhibiting a typical overall lower density of SW, older individuals  
69 reportedly exhibit higher probabilities of producing slow as compared to fast switcher SWs, providing  
70 important insights into age-related changes in sleep microstructure.

71 Investigating the coupling of spindles and SW, appropriately split between the slow and fast  
72 switchers, in late middle-aged healthy adults may be the best approach to gain insight into the biology  
73 underlying the early relationship between sleep and AD-related processes. In a longitudinal study, we  
74 therefore tested whether the coupling of spindles with the slow and the fast switcher SWs is associated  
75 with the early brain burden of A $\beta$  and memory performance in a large sample (N=100) of healthy and  
76 cognitively normal individuals in late midlife (50-70y). We recorded habitual sleep in these individuals  
77 devoid of sleep disorders of both sexes (59.5 $\pm$ 5y; 68 woman) under EEG and extracted the density and  
78 coupling of spindle and fast and slow switcher SWs over frontal derivations. The burden of A $\beta$  was  
79 assessed using Positron Emission Tomography (PET) tracers (<sup>18F</sup>Flutemetamol, N=96; <sup>18F</sup>Florbetapir,  
80 N=4) over the medial prefrontal areas, known to be an early site for A $\beta$  deposits and the most important  
81 generator of SWs during sleep<sup>6,29-31</sup>. Performance to the Mnemonic Similarity Task (MST), a memory  
82 task highly sensitive to early signs of cognitive decline<sup>32,33</sup>, was assessed in all participants  
83 concomitantly to EEG and PET measurements (N=100) as well as at follow-up, 2 years later, in a  
84 substantial subsample (N=66). We hypothesised that our large sample of individuals, positioned

85 relatively early in the ageing process, would allow to detect subtle associations between the impaired  
86 fine-tuned coupling of spindles and slow and fast switcher SWs, and both the early A $\beta$  burden and  
87 memory performance decline over 2 years.

## 88 **RESULTS**

### 89 *Slow but not fast switcher SW show preferential coupling with spindles*

90 We first assessed whether spindles were specifically associated with a particular phase on the  
91 down-to-up state transition of the SWs, considering the two types of SWs (slow and fast switchers). Of  
92 the 341.836 detected slow switcher SWs, 75.910 co-occurred with a spindle (22%); while of the 78.235  
93 fast switcher SWs, 26.912 (34%) were found to co-occur with a spindle. Regarding spindles, 563.928  
94 spindles were detected over all the recordings, of which 102.822 were coupled to a SW (18%), 75.910  
95 to slow switcher SWs (13%) and 26.912 to fast switcher SWs (5%). Statistical analysis with Watson's  
96  $U^2$  test showed that the distribution of spindle onset was significantly different between slow and fast  
97 switcher SWs (**Figure 1B**) ( $U^2 = 71.143$ ,  $p < 0.001$ ). Indeed, spindles were preferentially anchored only  
98 onto slow switchers, as spindles were most often initiated on the ascending phase of the depolarised  
99 state of the slow switcher SWs, while no such preferred coupling was detected for fast switcher SWs  
100 (**Figure 1C**). As the slow switcher SWs are the only SW to exhibit a preferential coupling with spindles,  
101 they remained our main focus of interest for the remaining analyses.

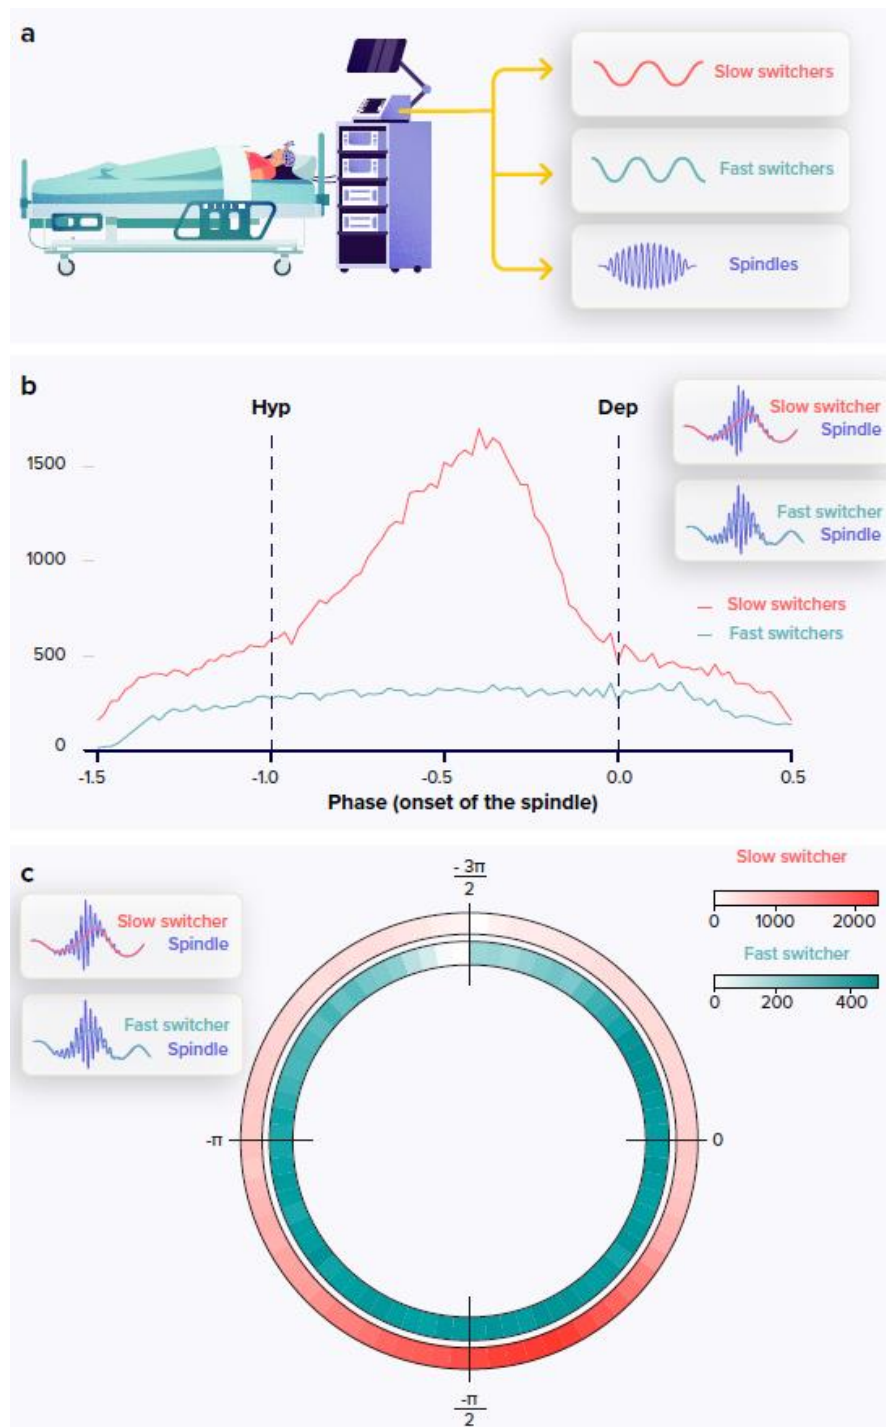

102

103 *Figure 1. Following a screening night and a regular sleep-wake schedule for 1 week, the participants (N=100;*  
 104 *age +; 68 women) slept in the lab at their habitual times under EEG recording. We extracted the density and*  
 105 *coupling of spindles and fast and slow switcher SWs over frontal derivations during N2 and N3 sleep stage from*  
 106 *EEG recordings (panel A). Analysis of the anchoring of the spindles onto the SWs showed a preferential*  
 107 *coupling phase only for slow (red) but not fast switcher SWs (light blue) (the y axis represents the number of*  
 108 *spindles starting at a specific SW phase) (panel B). Circular representation of the anchoring of the spindles*  
 109 *onto the SW phase:  $-\pi/2$  represents the hyperpolarisation (down state), 0 represents the depolarisation of the*

110 *SW. Heatmap represents the density of the spindles with their onset on specific slow wave phase in 5° bins*  
111 *across all participant nights, for slow (red) and fast switcher SWs (light blue)(panel C).*

112 *Spindle onset on slow switcher SW is linked to prefrontal A $\beta$  burden*

113 Statistical analysis revealed that the anchoring of the spindle onset onto slow switcher SWs was  
114 significantly linked to the burden of A $\beta$  over the medial prefrontal cortex (MPFC) (**Figure 2A**) (main  
115 effect of A $\beta$  PET uptake:  $F_{1,96}=6.2$ ,  **$p=0.014$** ,  $r^2_{\beta^*}=0.06$ ), where earlier onset of the spindle relative to  
116 the SW phase was associated with higher A $\beta$  PET uptake (**Figure 2B**). This effect was detected while  
117 controlling for the differences between sexes (main effect of sex:  $F_{1,96}=5.01$ ,  $p=0.028$ ,  $r^2_{\beta^*}=0.05$ ), as a  
118 later spindle onset was found in men relative to women, and controlling for age (main effect of age,  
119  $F_{1,96}=0.04$ ,  $p=0.85$ ). We assessed the specificity of this association and show that the anchoring of the  
120 spindle onset onto fast switcher SWs was not linked to the A $\beta$  burden over the MPFC (main effect of  
121 A $\beta$  PET uptake:  $F_{1,96}=0.20$ ,  $p=0.65$ ), after controlling for age (main effect of age:  $F_{1,96}=0.41$ ,  $p=0.53$ )  
122 and sex (main effect of sex:  $F_{1,96}=0.48$ ,  $p=0.49$ ) (**Figure 2C**). In addition, the density of slow switcher  
123 SWs (main effect of A $\beta$  PET uptake:  $F_{1,96}=0.14$ ,  $p=0.71$ ) or of spindles (main effect of A $\beta$  PET uptake:  
124  $F_{1,96}=0.09$ ,  $p=0.76$ ) was not associated with the MPFC A $\beta$  burden (**Figure 2D-E**), further reinforcing  
125 the idea that it is the coupling of sleep microstructure elements that matters rather than their individual  
126 occurrence. Likewise, unlike previous reports<sup>6,23</sup>, we did not find any association between the MPFC  
127 A $\beta$  burden and several characteristics of the SWs (SW density - per min of NREM sleep -  $F_{1,95}=1.18$ ,  
128  $p=0.28$ ; spindle density – per min of NREM sleep -  $F_{1,95}=0.06$ ,  $p=0.80$ ; cumulated power generated in  
129 the delta band - or slow wave energy (SWE) -  $F_{1,95}=0.84$ ,  $p=0.36$ ; the proportion of slower oscillations  
130 (0.5-1 Hz) over the delta power (1.25-4 Hz) - SO/delta proportion -  $F_{1,95}=2.82$ ,  $p=0.10$ ), after correcting  
131 for age, sex and total sleep time (SW density: age:  $F_{1,95}=5.49$ ,  $p=0.02$ ,  $r^2_{\beta^*}=0.05$ ; sex:  $F_{1,95}=10.26$ ,  
132  $p=0.002$ ,  $r^2_{\beta^*}=0.1$ ; TST:  $F_{1,95}=0.5$ ,  $p=0.48$ ; spindle density: age:  $F_{1,95}=0.56$ ,  $p=0.46$ , sex:  $F_{1,95}=0.42$ ,  
133  $p=0.52$ , TST:  $F_{1,95}=0.36$ ,  $p=0.55$ ; SWE: age:  $F_{1,95}=4.2$ ,  $p=0.04$ ,  $r^2_{\beta^*}=0.04$ ; sex:  $F_{1,95}=6.63$ ,  $p=0.01$ ; TST:  
134  $F_{1,95}=0.9$ ,  $p=0.34$ ; SO/delta proportion: age:  $F_{1,95}=3.28$ ,  $p=0.07$ , sex:  $F_{1,95}=0.0$ ,  $p=0.96$ , TST:  $F_{1,95}=2.7$ ,  
135  $p=0.10$ ) (**Suppl. Fig. 1**).



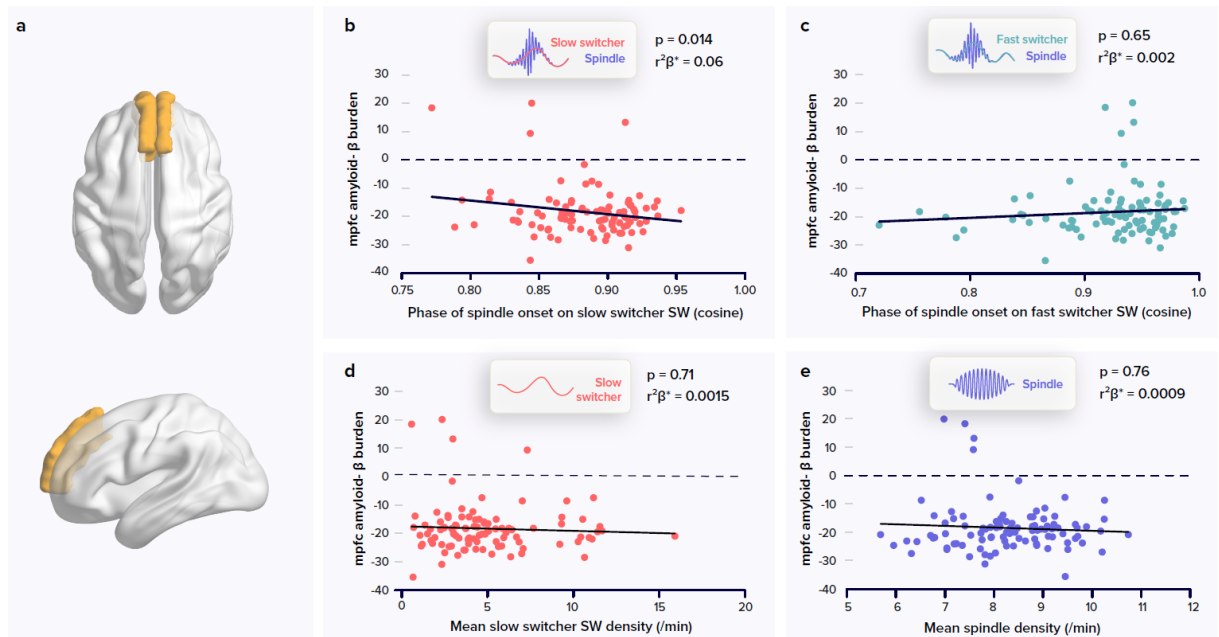

136

137 **Figure 2. Relationships between spindles and slow waves metrics and the amyloid-β (Aβ) burden.** PET  
138 signal uptake was measured over the medial prefrontal cortex (MPFC) depicted in yellow (panel A). Significant  
139 negative association between the MPFC Aβ burden and spindle-slow switcher SW coupling (panel B). No  
140 association between the MPFC Aβ burden and spindle-fast switcher SW coupling (panel C). No association  
141 between the MPFC Aβ burden and slow switcher SW density (panel D). No association between the MPFC Aβ  
142 burden and spindle density (panel E). P values and  $r^2\beta^*$  were computed from the GLMMs referred to in the text.  
143 Simple regressions were used only for a visual display and do not substitute the GLMM outputs. We used the  
144 cosine value of the phase of coupling in the GLMMs (see methods).

145 To test the apparent difference in the association between the coupling of spindles onto slow  
146 and fast switcher SWs with the accumulation of Aβ protein, we further computed a statistical model  
147 with spindle-SW coupling as the dependent variable, while including the SW type together with the Aβ  
148 MPFC burden as independent variables. Statistical analysis yielded a significant interaction between the  
149 burden of Aβ in the MPFC and the type of SWs (Aβ burden by SW type interaction:  $F_{1,96}=7.05$ ,  $p=0.009$ ;  
150  $r^2_{\beta^*}=0.07$ ), while *post-hoc* tests indicated that the link between the coupling of the spindle onto the SW  
151 and the MPFC Aβ burden was significant for the slow switcher type ( $t_{149,8}=-2.00$ ,  $p=0.047$ ) and not for  
152 the fast switcher type ( $t_{149,8}=0.56$ ,  $p=0.57$ ). This finding reinforces the idea that slow and fast switcher  
153 SWs constitute distinct realisations of NREM oscillations that are differently associated with brain  
154 aggregation of Aβ during the ageing process. This has likely contributed to previous failures to detect  
155 links between the coupling of spindles and SW and the deposit of Aβ. In fact, when testing the  
156 association between the coupling of spindles and SWs, irrespective of the type of SWs, and PET Aβ



157 burden over the MPFC, the statistical analysis only yields a weak negative association between the phase  
158 of the coupling of the spindle onto the SW and A $\beta$  burden (main effect of A $\beta$  uptake:  $F_{1,96}=3.96$ ,  
159  $p=0.049$ ,  $r^2_{\beta^*}=0.04$ ; main effect of sex:  $F_{1,96}=4.33$ ,  $p=0.04$ ,  $r^2_{\beta^*}=0.04$ ; main effect of age:  $F_{1,96}=0.05$ ,  
160  $p=0.83$ ), which could arguably go undetected in a smaller or different sample.

161 *Slow switchers spindle phase coupling is associated to memory change over two years*

162 We tested whether the coupling of spindles with slow switcher SWs was associated with  
163 memory performance and its decline over 2 years using the mnemonic similarity task (MST) (**Figure**  
164 **3A**). The MST consists in a pattern separation task targetting the ability to distinguish between highly  
165 resembling memory events, a hippocampus dependent task which is very sensitive to early cognitive  
166 decline<sup>32,33</sup>. Across the sample, we observed an overall decline in performance between the baseline and  
167 follow-up performance at the MST ( $t_{65} = 2.19$ ,  $p=0.032$ ). We found no significant link between the  
168 coupling of the spindles onto both SW types and the performance on the task at baseline (i.e. assessed  
169 at the same time as the sleep measures) (slow switchers: *main effect of spindle-SW coupling*:  $F_{1,96}=0.26$ ,  
170  $p=0.61$ ; main effect of age:  $F_{1,96}=0.36$ ,  $p=0.55$ , main effect of sex:  $F_{1,96}=0.41$ ,  $p=0.52$ , main effect of  
171 education:  $F_{1,96}=0.47$ ,  $p=0.50$ ; fast switchers: *main effect of spindle-SW coupling*:  $F_{1,96}=0.02$ ,  $p=0.88$ ;  
172 main effect of age:  $F_{1,96}=0.34$ ,  $p=0.56$ , main effect of sex:  $F_{1,96}=0.54$ ,  $p=0.46$ , main effect of education:  
173  $F_{1,96}=0.40$ ,  $p=0.53$ ) (**Figure 3B-C**). By contrast, statistical analyses revealed a significant negative link  
174 between the relative change in memory performance and the phase of spindle anchoring onto slow  
175 switcher SWs, indicating that an earlier spindle onset is predictive of a memory worsening over two  
176 years (main effect of spindle-slow switcher SW coupling:  $F_{1,61}=4.80$ ,  $p=0.032$ ,  $r^2_{\beta^*}=0.07$ ), after  
177 correcting for age (main effect of age:  $F_{1,61}=0.25$ ,  $p=0.62$ ), sex (main effect of sex:  $F_{1,61}=0.20$ ,  $p=0.66$ )  
178 and education (main effect of education:  $F_{1,61}=0.25$ ,  $p=0.62$ ) (**Figure 3D-E**). No such association was  
179 detected when considering spindle coupling to fast switcher SWs (main effect of spindle-fast switcher  
180 SW coupling:  $F_{1,61}=2.51$ ,  $p=0.12$ ; main effect of age:  $F_{1,61}=0.33$ ,  $p=0.57$ , main effect of sex:  $F_{1,61}=0.18$ ,  
181  $p=0.68$ , main effect of education:  $F_{1,61}=1.11$ ,  $p=0.30$ ). Further statistical analyses show that the memory  
182 performance change over the 2-year is not significantly related to the MPFC A $\beta$  burden (main effect of

183  $A\beta$  burden:  $F_{1,60}=2.33$ ,  $p=0.13$ ; main effect of age:  $F_{1,60}=1.27$ ,  $p=0.26$ , main effect of sex:  $F_{1,60}=0.03$ ,  
 184  $p=0.87$ , main effect of education:  $F_{1,60}=0.41$ ,  $p=0.53$ ).

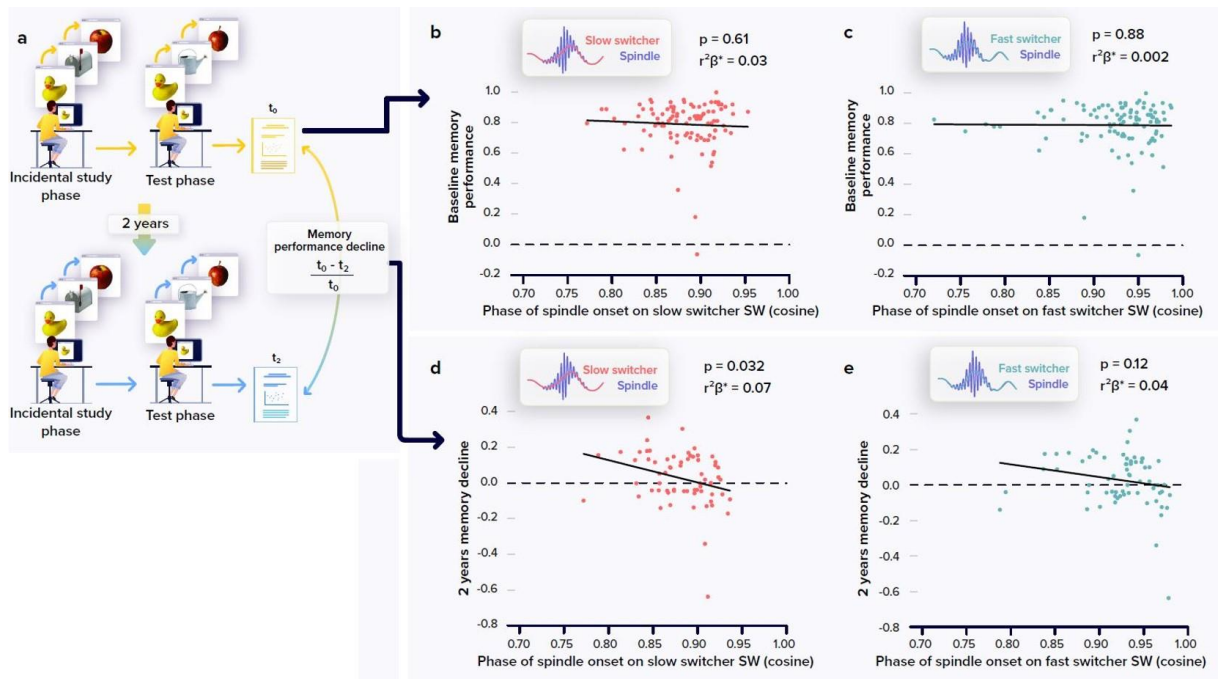

185

186 **Figure 3. Relationships between memory performance and coupling between spindles and SWs.** Memory  
 187 performance was assessed through the Mnemonic Similarity Task (MST) where participants have to recognized  
 188 previously encoded images in series of new or lure images (see methods) (panel A). No association between the  
 189 baseline MST performance and spindle-slow switcher SW coupling (panel B). No association between the baseline  
 190 MST performance and spindle-fast switcher SW coupling (panel C). Significant negative association between the  
 191 2 years relative change in MST performance and spindle-slow switcher SW coupling (panel D). No association  
 192 between the 2 years relative changes in MST performance and spindle-fast switcher SW coupling (panel D). P  
 193 values and  $r^2\beta^*$  were computed from GLMMs referred to in the text. Simple regressions were used only for a visual  
 194 display and do not substitute the GLMM outputs. We used the cosine value of the phase of coupling in the GLMMs  
 195 (see methods).

## 196 DISCUSSION

197 In order to unravel early associations between the microstructure of sleep and the burden of  $A\beta$   
 198 in the brain, and their cognitive implications, we collected polysomnography, PET and behavioral data  
 199 in a relatively large sample of individuals without cognitive impairments or sleep disorders. To this end,  
 200 we recruited individuals in late middle age (50-70y), that could in most cases only present limited age-  
 201 related alterations in sleep and accumulation of  $A\beta$  protein in the brain<sup>34</sup>. We investigated whether the  
 202 coupling of spindles onto SWs, showing a slower and a faster frequency of transition from the down to

203 the up states (slow and fast switcher SWs) was associated to the accumulation of A $\beta$  over the medial  
204 prefrontal cortex. We further probed whether the coupling of spindles onto SWs was associated with the  
205 performance to a sensitive memory test, assessed at the time of the sleep and PET recordings and,  
206 longitudinally, 2 years later. The coupling of spindles onto the slow, but not the fast, switcher SWs was  
207 significantly associated with the A $\beta$  PET signal assessed over the MPFC. Moreover, this coupling  
208 between spindles and slow switcher SW was significantly linked to the memory performance change  
209 detected 2 years after the initial assessment. Overall, our results provide compelling evidence that the  
210 link between sleep and the accumulation of A $\beta$  over the MPFC, an early AD-related brain features,  
211 involves the precise and timely coupling of two key elements of NREM sleep, spindles and SWs, and  
212 that this coupling bears a predictive value for the subsequent decline in memory performance. Our study  
213 does not indicate, at least not in these healthy and relatively young older adults, that the amount of  
214 spindles or SW generated overnight is associated with the accumulation of A $\beta$  over the MPFC.

215 Sleep SWs provide a readout of the homeostatic sleep pressure and are more prevalent at the  
216 beginning relative to the end of the night<sup>35</sup>. In addition, both the density of spindles and SWs have  
217 separately been related to overnight consolidation of memory<sup>21,36</sup>. They actively take part in information  
218 transfer from hippocampic to neocortical networks and in synaptic plasticity<sup>17,21</sup>. Recent research has  
219 put forward the importance of their precise phase coupling during sleep, and reported an age-related  
220 difference in that coupling<sup>22</sup>. In the younger individuals, spindles tend to reach their maximum around  
221 the cortical up-state of the SWs, whereas in older individuals, spindles occur earlier on the depolarisation  
222 phase of the SWs. This earlier coupling between spindles and SWs is related to a poorer overnight  
223 memory retention<sup>22</sup>, suggesting a sub-optimal neuronal interplay for the exchange of information during  
224 sleep in older individuals. In line with a presumed suboptimal coupling between spindles and SWs, we  
225 find that, when controlling for age, individuals for which the spindles occur earlier during the transition  
226 phase of the slow switcher SWs, show higher A $\beta$  burden over the MPFC and a worse memory change  
227 over time. We did not find any significant effect of the age of participants on the phase of the coupling  
228 between spindles and SWs. This is likely due in part to the restricted age range of our participants, but  
229 also to the variability existing between the individuals in the changes they undergo in their sleep during

230 ageing. Importantly, the relationship we observed between the phase of the spindle onset onto the SW  
231 and the MPFC A $\beta$  burden shows the same directionality (i.e. earlier spindles onto SW) as the changes  
232 previously reported in older individuals.

233 SWs were previously characterised according to the frequency of their transition from the down-  
234 to the up-state, which reflects the relative synchronisation of the depolarisation of the neurons when  
235 generating a SW<sup>28</sup>. Beyond the well-known decrease in the production of SWs in aging, the slow  
236 switcher SWs were relatively preserved in the older individuals compared to the fast switcher SWs. This  
237 finding suggests that the two populations of SWs constitute distinct elements of sleep microstructure.  
238 Three present results confirm that the two types of SW –slow and fast switchers – behave differentially.  
239 First, sleep spindles show a preferential coupling only with the transition period from down-to-up state  
240 of the slow switcher SWs, while spindles occurring concomitantly to fast switchers SWs do not occur  
241 at a specific phase of the SWs. Furthermore, only the coupling of spindles onto slow switcher SWs was  
242 significantly associated to the early accumulation of A $\beta$  in the brain. Finally, only the coupling of  
243 spindles and slow switcher SWs was predictive of the memory change after 2 years. Our results support  
244 that slow switcher SWs, the type previously reported to be relatively spared during aging<sup>28</sup>, is important  
245 to the development of AD-related pathological changes, at least in the form of A $\beta$  protein accumulation,  
246 and for the subsequent development of subtle alteration in the cognitive abilities, leastways over the  
247 memory domain.

248 Sleep spindles are considered as thalamic events. They are generated through the interplay  
249 between the inhibitory reticular nucleus and the excitatory thalamocortical neurons, which project to the  
250 cortical neurons that feedback in turns to the thalamus<sup>17</sup>. In contrast, SWs are intrinsically cortical. They  
251 consist in the spontaneous alternations between down (hyperpolarized) and up (depolarized) neuronal  
252 states<sup>37</sup>. The SWs undergo, however, an influence from the thalamus reticular nucleus that contributes  
253 to the synchronization of distant neuronal populations<sup>26,37</sup>. Hence, although the exact neurophysiological  
254 origin of the functional associations between spindles and SWs remain to be established, the thalamus  
255 reticular neurons could arguably be involved. Our results would therefore indicate that the early  
256 aggregation of A $\beta$  protein in the medial prefrontal cortex could disturb the thalamocortical interplay

257 driving the coalescence of spindles and SWs. This chronic disturbance would then trigger the cognitive  
258 changes detectable after 2 years. The cross-sectional nature of our imaging data does not, however, allow  
259 to make inferences regarding the directionality of the relationship between the spindle-slow switcher  
260 SW coupling and the burden of A $\beta$  protein. Evidence accumulates to show that if AD-neuropathological  
261 hallmarks can affect the quality of sleep, sleep can also impinge onto these hallmarks<sup>14,38</sup>. Specifically  
262 relevant in the context of this study, the occurrence of the SWs has been associated with a transient  
263 increase in the glymphatic flow related to local variations in neuromodulator concentrations<sup>39</sup>. It is  
264 therefore possible that the changes in the density of SWs occurring during ageing affect both their  
265 coupling with spindles and the early accumulation of A $\beta$  protein.

266 We found that the density of either spindles or SWs is not related to the early accumulation of  
267 the A $\beta$  protein in the medial prefrontal cortex. This suggests a specific role for the coupling of both  
268 elements of sleep microstructure. Moreover and as previously reported in an intermediate analysis of a  
269 subsample of the same study<sup>40</sup>, we do not find significant associations between more macroscopic  
270 measures, which are typically used to characterize sleep, and the accumulation of A $\beta$  protein. The  
271 cumulated power of the oscillations generated in the delta band (i.e. the slow wave energy - SWE), and  
272 the proportion of slower oscillations over the delta power were not associated with PET measures. This  
273 finding argues against the idea that these rougher measures of sleep disruption constitute the earliest  
274 manifestations of the association between sleep and AD-related processes and contrasts with previous  
275 reports in a smaller sample of individuals older (> 70y) than our sample. Altogether, these discrepancies  
276 reinforce the idea that the alteration in the microstructure of sleep, consisting in the coupling of the  
277 spindles onto a specific subpopulation of SWs, as reported here, but also in the occurrence of micro-  
278 arousals during sleep we previously reported based on the same sample<sup>41</sup>, shows a prior association with  
279 AD-related processes compared with the amount of slow brain oscillations generated during overnight  
280 sleep. The latter may only be significantly associated at a later age, when the pathophysiological changes  
281 are already more substantial. In addition, the coupling of spindles onto slow switcher SWs is predictive  
282 of the future change in memory performance. Sleep microstructure could therefore constitute a  
283 promising early marker of future cognitive and brain ageing trajectory<sup>41</sup>. We did not evaluate whether

284 distinct links between the SW types and slow and fast spindles are observed. As some reports describe  
285 that fast spindles are rather coupled to the up-state of the SWs and slow spindles tend to occur on the  
286 waning depolarisation phase of the SWs<sup>42</sup>, we could hypothesise that the associations we observe are  
287 probably rather driven by fast spindles. Future investigations are, however, needed to confirm this  
288 hypothesis

289         One should bear in mind the potential limitations of our study. First, although we collected data  
290 in a relatively large sample, we may have insufficient power to detect some associations with other sleep  
291 measures. One can nevertheless frame our findings in relative terms such that association between  
292 spindle-SWs coupling and the early accumulation of A $\beta$  protein is at least stronger than the association  
293 with the coupling of spindles onto fast switchers SW, the density of SWs and spindles, the SWE, etc.  
294 Also, the longitudinal aspect of our study is relatively short-termed and only concerned the performance  
295 to a sensitive mnesic task while it did not include sleep EEG and the PET assessments. Further studies  
296 should evaluate the predictive value of such parameters on longer longitudinal protocols, and the  
297 evolution of the sleep EEG and the PET parameters as well as their generalisability over other  
298 precociously impacted cognitive abilities. Finally, given that our protocol does not include manipulation  
299 of the coupling of the spindles onto the SWs, it precludes any inference on the causality of one aspect  
300 onto the other.

301         Together, our findings reveal that the timely occurrence of spindles onto a specific type of SWs  
302 showing a relative preservation in ageing seems to play a determining role in ageing trajectory, both at  
303 the cognitive level and with regards to structural brain integrity. These findings may help to unravel  
304 early links between sleep, AD-related pathophysiology and cognitive trajectories in ageing and warrants  
305 future clinical trials attempting at manipulating sleep microstructure or A $\beta$  protein accumulation.

306

## 307 **MATERIALS AND METHODS**

308 *Study design and participants*

309 101 healthy participants aged from 50 to 70 y (68 women; mean  $\pm$  SD = 59.4  $\pm$  5.3 y) were  
 310 enrolled between 15 June 2016 and 2 October 2019 for a multi-modal cross-sectional study taking place  
 311 at the GIGA-Cyclotron Research Centre/In Vivo Imaging of the University of Liège (Cognitive fitness  
 312 in aging – COFITAGE – study) which has already led to several scientific publications [e.g. <sup>41,43</sup>]. One  
 313 participant was excluded from analyses due to lack of PET imaging data. The exclusion criteria were as  
 314 follows: clinical symptoms of cognitive impairment (Mattis Dementia Rating Scale >130 ; Mini-Mental  
 315 State Evaluation (MMSE) >27) ; recent history psychiatric history or severe brain trauma ; self-reported  
 316 or clinically diagnosed sleep disorder ; Body Mass Index (BMI)  $\leq$ 18 and  $\geq$ 29; use of medication  
 317 affecting sleep or the central nervous system; smoking; excessive alcohol (>14 units/week) or caffeine  
 318 (>5 cups/day) consumption; shift work in the 6 months or transmeridian travel in the 2 months preceding  
 319 the study. All participants gave their written informed consent prior to their participation. The study was  
 320 registered with EudraCT 2016-001436-35. All procedures were approved by the Hospital-Faculty Ethics  
 321 Committee of ULiège. All participants signed an informed consent prior to participating in the study.

322 **Table 1: Sample characteristics**

|                                              | Baseline (N=100)               | Follow up (N=66)                 |
|----------------------------------------------|--------------------------------|----------------------------------|
| Sex                                          | 68 ♀ / 32 ♂                    | 44 ♀ / 22 ♂                      |
| Age (years)                                  | 59.4 $\pm$ 5.3 [50-69]         | 59.9 $\pm$ 5.4 [50-69]           |
| Education (years)                            | 15.2 $\pm$ 3.0 [9 - 25]        | 14.9 $\pm$ 3.3 [9-25]            |
| Total sleep time (TST) (minutes, EEG)        | 392.8 $\pm$ 45.9 [229 – 495.5] | 390.4 $\pm$ 45.9 [264.0 – 495.5] |
| Time spent in N1 sleep stage (% of TST, EEG) | 6.2 $\pm$ 2.8 [0.6 - 15.6]     | 6.4 $\pm$ 3.0 [0.6 – 15.6]       |
| Time spent in N2 sleep stage (% of TST, EEG) | 51.6 $\pm$ 8.9 [31.4 - 75.7]   | 50.3 $\pm$ 8.5 [32.8 – 75.7]     |
| Time spent in N3 sleep stage (% of TST, EEG) | 19.2 $\pm$ 6.4 [7.2 - 38.3]    | 19.7 $\pm$ 6.5 [8.2 – 38.3]      |
| Time spent in REM sleep (% of TST, EEG)      | 23.1 $\pm$ 6.8 [6.5 – 39.8]    | 23.6 $\pm$ 7.4 [6.5 – 39.8]      |
| Mean SW density (number/minute of N2/N3)     | 7.1 $\pm$ 4.3 [0.8 – 19.2]     | 6.9 $\pm$ 4.0 [1.0 – 19.2]       |
| Slow switchers                               | 4.9 $\pm$ 3.1 [0.6 - 15.9]     | 4.9 $\pm$ 3.1 [0.6 – 15.9]       |



|                                               |                             |                             |
|-----------------------------------------------|-----------------------------|-----------------------------|
| Fast switchers                                | 2.1 ± 1.6 [0.1 - 8.8]       | 2.0 ± 1.3 [0.3 – 5.7]       |
| Mean SW amplitude (μV)                        | 101.5 ± 12.4 [76.0 - 128.2] | 101.0 ± 12.3 [76.0 – 125.2] |
| Slow switchers                                | 104.5 ± 13.7 [77.7 - 131.3] | 104.0 ± 13.5 [77.7 – 130.5] |
| Fast switchers                                | 94.0 ± 11.0 [73.0 - 130.1]  | 93.0 ± 10.1 [73.5 – 113.7]  |
| Mean SW frequency                             | 1.2 ± 0.1 [1.0 - 1.6]       | 1.2 ± 0.1 [1.1 – 1.6]       |
| Slow switchers                                | 1.1 ± 0.1 [1.0 - 1.3]       | 1.1 ± 0.1 [1.0 – 1.2]       |
| Fast switchers                                | 1.5 ± 0.1 [1.3 - 1.8]       | 1.5 ± 0.1 [1.3 – 1.8]       |
| Mean SW transition frequency                  | 1.4 ± 0.1 [1.1 - 1.8]       | 1.4 ± 0.1 [1.1 – 1.8]       |
| Slow switchers                                | 1.1 ± 0.0 [1.0 - 1.2]       | 1.1 ± 0.0 [1.0 – 1.2]       |
| Fast switchers                                | 2.0 ± 0.1 [1.9 - 2.2]       | 2.0 ± 0.1 [1.9 – 2.2]       |
| Mean spindle density (number/minute of N2/N3) | 8.3 ± 1.1 [5.7 – 10.7]      | 8.1 ± 1.0 [6.0 – 10.2]      |

323 *BMI, alcohol consumption, anxiety & depression scores as well as sleepiness levels of the sample can be found*  
 324 *in* <sup>41</sup>

### 325 *Sleep assessment*

326 A first night of sleep was recorded at the laboratory under full polysomnography to avoid  
 327 potential first night effects and exclude volunteers with sleep apnoea (AHI ≥15/h). A second night of  
 328 sleep was recorded with electroencephalography (EEG), following one week of regular sleep-wake  
 329 schedule based on each participant's preferred bed and wake up time (compliance was verified by  
 330 actimetry and sleep diary - Actiwatch©, Cambridge Neurotechnology, UK). Sleep was recorded with  
 331 N7000 amplifiers (EMBLA, Natus, Planegg, Germany). The recording comprised 11 EEG derivations,  
 332 placed according to the 10-20 system (F3, Fz, F4; C3, Cz, C4; P3, Pz, P4; O1, O2), 2 bipolar  
 333 electrooculogram (EOGs), and 2 bipolar submental electromyogram (EMG) electrodes. Sampling was  
 334 set at 200 Hz, and the signal was re-referenced to the mean of the two mastoids. Recordings were scored  
 335 for sleep stages in 30s windows using a validated automatic algorithm (ASEEGA, Physip, Paris, France)  
 336 <sup>44,45</sup>. Automatic arousal and artefact detection <sup>46,47</sup> was performed in order to remove EEG segments  
 337 containing artefacts and arousals from further analysis.

### 338 *Slow waves and spindle detection*

339            Only the frontal electrodes were considered because the frontal cortex is an early site showing  
340  $A\beta$  deposit and is the primary generator of the SWs during sleep<sup>6,29-31</sup> as well as to facilitate  
341 interpretations of future large-scale studies using headband EEG restricted to frontal electrodes<sup>8</sup>. SWs  
342 were automatically detected during N2 and N3 epochs of NREM sleep devoid of artefacts/arousals >5s  
343 long, using a previously developed algorithm<sup>48</sup>. Data were first band-filtered between 0.3 and 4.0Hz  
344 with a linear phase Finite Impulse Response (FIR) filter. Following recent work, SW detection criteria  
345 were adapted for age and sex<sup>48</sup>: peak to peak amplitude  $\geq 70\mu\text{V}$  (resp.  $\geq 60.5\mu\text{V}$ ) and negative amplitude  
346  $\leq -37\mu\text{V}$  (resp.  $\leq -32\mu\text{V}$ ) was used for women (resp. for men), instead of the standard  $\geq 75\mu\text{V}$  and  $\leq -$   
347  $40\mu\text{V}$ ). The duration of the negative deflection had to fit in the range 125-1500ms, and the duration of  
348 the positive deflection could not exceed 1000ms. The SWs were sorted according to their transition  
349 frequency<sup>28</sup> (inverse of the duration between the hyperpolarised and depolarised state) into either slow  
350 or fast switchers (the critical value for distinguishing between the two types being the intersection  
351 between two gaussians, around 1.2Hz<sup>28</sup>). Sleep spindles were also automatically detected over the same  
352 N2 and N3 epochs with a previously published method<sup>49-51</sup>. The EEG signal was bandpass filtered  
353 between 10 and 16Hz with a linear phase finite impulse response filter (-3dB at 10 and 16Hz). After  
354 detection of SW and spindles, analysis of their coincidence was performed. A coincidence was defined  
355 as a co-occurrence of both the ignition and the maximum amplitude of a spindle over the phase of a slow  
356 wave. This criterion was used on slow and fast switchers.

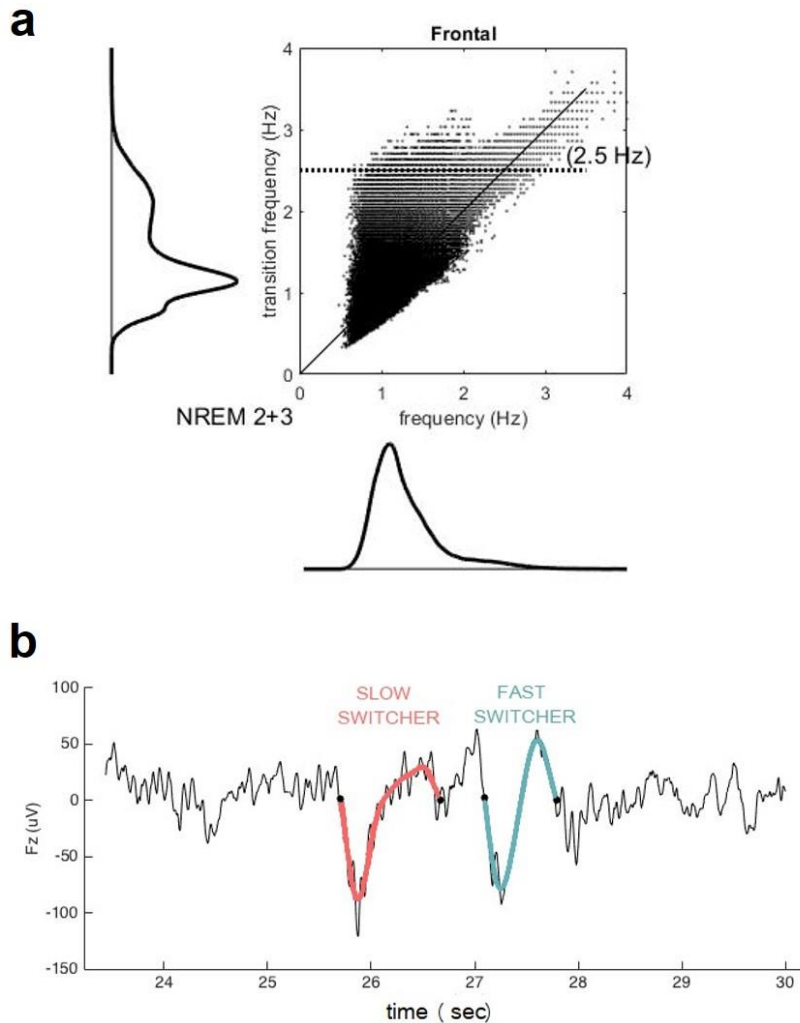

357

358 *Figure 4. Distribution of the mean frequency of the slow waves (x axis) versus their transition frequency (y*  
359 *axis) for both NREM2 and NREM3 sleep stages (panel A) in the entire study sample. One can observe a double*  
360 *distribution of the frequency of transition but not in the overall frequency. Example of slow switcher (red) and*  
361 *fast switcher SW (light blue) extracted from the EEG signal.*

362 *MRI data*

363 Quantitative multi-parametric MRI acquisition was performed on a 3-Tesla MR scanner  
364 (Siemens MAGNETOM Prisma, Siemens Healthineers, Erlangen, Germany). Quantitative maps were  
365 obtained by combining the images using different parameters sensitive to distinct tissue properties. The  
366 multi-parameter mapping was based on multi-echo 3D fast low angle shot at 1 mm isotropic resolution<sup>52</sup>.  
367 This included three datasets with T1, proton density (PD), and magnetization transfer (MT)-weighted  
368 contrasts imposed by the choice of the flip angle (FA = 6° for PD & MT, 21° for T1) and the application  
369 of an additional off-resonance Gaussian-shaped RF pulse for the MT-weighted acquisition. MRI multi-

370 parameter maps were processed with the hMRI toolbox<sup>53</sup> (<http://hmri.info>) and SPM12 (Welcome Trust  
371 Centre for Neuroimaging, London, UK) to obtain notably a quantitative MT, which was segmented into  
372 grey matter, white matter, and CSF using unified segmentation<sup>54</sup>. Flow-field deformation parameters  
373 obtained from DARTEL spatial normalisation of the individual MT maps were applied to the averaged  
374 co-registered PET images<sup>55</sup>. The volumes of interest were determined using the automated anatomical  
375 labelling (AAL) atlas<sup>56</sup>.

#### 376 *PET-scan*

377 A $\beta$  PET imaging was performed using [<sup>18</sup>F]Flutemetamol, except for 3 volunteers for which  
378 [<sup>18</sup>F]Florbetapir was used. PET-scans were performed on an ECAT EXACT+ HR scanner (Siemens,  
379 Erlangen, Germany). Participants received a single dose of the radioligand in the antecubital vein (target  
380 dose 185 $\pm$ 10% MBq); image acquisition started 85min after the injection and consisted of 4 frames of  
381 5 minutes, followed by a 10 minutes transmission scan using <sup>68</sup>Ge line sources. Images were  
382 reconstructed using a filtered back-projection algorithm including corrections for the measured  
383 attenuation, dead time, random events, and scatter using standard software (Siemens ECAT – HR +  
384 V7.1, Siemens/CTI Knoxville, TN, USA). Individual PET average images were produced using all  
385 frames and were then manually reoriented according to MT-weighted structural MRI volumes and  
386 coregistered to the individual space structural MT map. Standardised uptake value ratio (SUVR) was  
387 computed using the whole cerebellum as reference region<sup>57</sup>. As images were acquired using 2 different  
388 radioligands, their SUVR values were converted into Centiloid Units<sup>57</sup> (the validation of the procedure  
389 in our sample was previously published<sup>58</sup>). The A $\beta$  burden was averaged over a mask covering the  
390 medial prefrontal cortex previously reported to undergo the earliest aggregation sites for A $\beta$  pathology<sup>34</sup>.

#### 391 *Cognitive assessments*

392 As part of an extensive neuropsychological assessment, participants were administered the  
393 Mnemonic Similarity Task (MST)<sup>59</sup>, a visual recognition memory task. After an incidental encoding  
394 phase during which participants were randomly presented 128 common objects for a period of 2s, and  
395 were instructed to determine whether the object presented on the screen was rather an ‘indoor’ or

396 ‘outdoor’ item, the recognition memory phase consisted in the presentation of 192 objects (64 old,  
397 presented previously – target items; 64 similar but not identical to the previously presented stimuli –  
398 lure; and 64 new objects – foil items). In this phase, participants were instructed to determine whether  
399 the presented object was new (foil), previously presented (old), or similar but not perfectly identical  
400 (lure). For statistical analyses, the recognition memory score was used (RM), computed as the difference  
401 between the rate of calling a target item “old” minus the rate of calling a foil item “old” [ $P(\text{“old”}|\text{target})-$   
402  $P(\text{“old”}|\text{foil})$ ]<sup>32,43</sup>.

403 The MST was administered at two timepoints: the first time, the day preceding the baseline  
404 night, during a cognitive evaluation performed ~ 6.5h before habitual bedtime. The second  
405 neuropsychological evaluation was carried out ~24 months after the first one (mean 767±54 days). The  
406 memory decline score was computed as the baseline performance minus the follow-up performance,  
407 divided by the baseline performance, so that a higher score indicates a higher decline over the 2 years.

$$408 \quad \text{memory decline} = \frac{\text{RM baseline} - \text{RM follow-up}}{\text{RM baseline}}$$

#### 409 *Statistics*

410 Statistical analyses were performed using Generalised Linear Mixed Models (GLMMs) in SAS  
411 9.4 (SAS Institute, Cary, NC). The distribution of dependent variables was verified in MATLAB 2013a  
412 and the GLMMs were adapted accordingly. Subject was treated as a random factor and each model was  
413 corrected for age and sex effects. Kenward-Roger’s correction was used to determine the degrees of  
414 freedom. Cook’s distance was used to assess the potential presence of outliers driving the associations,  
415 and as values ranged below 0.45 no datapoint was excluded from the analyses (a Cook’s distant > 1 is  
416 typically considered to reflect outlier value). Our main analysis concerned the coupling between SW  
417 types and spindles, and as two analyses were performed (one with slow switcher and one with fast  
418 switcher SW), the significance threshold is set at  $p < 0.025$  for these analysis, to account for multiple  
419 comparisons. The reader should note that we performed a separate statistical test with  $A\beta$  burden as  
420 dependent variable with both SW-spindle coupling and SW type as independent variables, which  
421 confirmed the associations reported in the separate models. The remaining analysis were exploratory as

422 they arise from the main analyses and do not require correction for multiple comparisons. Semi-partial  
423  $R^2$  ( $R^2_{\beta^*}$ ) values were computed to estimate the effect sizes of significant fixed effects and statistical  
424 trends in all GLMMs<sup>60</sup>. P-values in post-hoc contrasts (difference of least square means) were adjusted  
425 for multiple testing using Tukey's procedure. Watson's non-parametric two-sample  $U^2$  test for circular-  
426 normal data was performed in MATLAB 2019 to assess the difference between the distribution of  
427 spindle onset on the phase of slow waves for slow and fast switcher SW. For analyses using the phase  
428 of spindle onset on the slow waves, as the phase of all subjects were in the quarter between the zero  
429 crossing ( $-\pi/2$ ) and depolarisation, the cosine of the phase was used instead of the phase, in order to  
430 perform linear statistics. Statistics with the phase yielded the same results.

431 Optimal sensitivity and power analyses in GLMM remains under investigation [e.g. <sup>61</sup>]. We nevertheless  
432 computed a prior sensitivity analysis to get an indication of the minimum detectable effect size in our  
433 main analyses given our sample size. According to G\*Power 3 (version 3.1.9.4)<sup>62</sup> taking into account a  
434 power of .8, an error rate  $\alpha$  of .025 (corrected for 2 tests), a sample size of 100 allowed us to detect small  
435 effect sizes  $r > .29$  (2-sided; absolute values; confidence interval: .1 – .46;  $R^2 > .08$ ,  $R^2$  confidence  
436 interval: .01 – .21) within a linear multiple regression framework including 1 tested predictor ( $A\beta$ ) and  
437 2 covariates (age, sex).

438

439 **Acknowledgements:** We thank M. Blanpain, P. Cardone, M. Cerasuolo, E. Lambot, P.  
440 Ghaemmaghami, C. Hagelstein, S. Laloux, E. Balteau, A. Claes, C. Degueldre, B. Herbillon, P. Hawotte,  
441 B. Lauricella, A. Lesoine, A. Luxen, X. Pepin, E. Tezel, D. Marzoli, C. Schmidt and P. Villar González  
442 for their help in different steps of the study. This work was supported by Fonds National de la Recherche  
443 Scientifique (FRS-FNRS, FRSM 3.4516.11, Belgium), Actions de Recherche Concertées (ARC  
444 SLEEPDEM 17/27-09) of the Fédération Wallonie-Bruxelles, University of Liège (ULiège), Fondation  
445 Simone et Pierre Clerdent, European Regional Development Fund (ERDF, Radiomed Project) and the  
446 Canadian Institutes of Health Research (CIHR) (grant number 190750). [18F]Flutemetamol doses were  
447 provided and cost covered by GE Healthcare Ltd (Little Chalfont, UK) as part of an investigator  
448 sponsored study (ISS290) agreement. This agreement had no influence on the protocol and results of

449 the study reported here. M.V.E., C.Bastin, F.C., C.P., and G.V. are/were supported by the F.R.S.-FNRS  
450 Belgium.

451 **Competing interests:** The authors do not report any conflict of interest. C. Berthomier is an owner of  
452 Physip, the company that analysed the EEG data as part of a collaboration. This ownership and the  
453 collaboration had no impact on the design, data acquisition and interpretations of the findings.

454 **Authors contributions:** Study concept and design: E.S., P.M., C.P., C.Bastin, F.C. and G.V. Data  
455 acquisition: D.C., M.V.E. J.N., V.M., C.Bastin, F.C., G.V. Data analysis and interpretation: all authors.  
456 D.C. and G.V. drafted the first version of the manuscript. All authors revised the manuscript and had  
457 final responsibility for the decision to submit for publication.

458



## 459 **References**

- 460 1. Carrier, J. *et al.* Sleep slow wave changes during the middle years of life. *Eur. J. Neurosci.* **33**,  
461 758–766 (2011).
- 462 2. Lim, A. S. P., Kowgier, M., Yu, L., Buchman, A. S. & Bennett, D. A. Sleep Fragmentation and  
463 the Risk of Incident Alzheimer’s Disease and Cognitive Decline in Older Persons. *Sleep* **36**,  
464 1027–1032 (2013).
- 465 3. Musiek, E. S. & Holtzman, D. M. Mechanisms linking circadian clocks, sleep, and  
466 neurodegeneration. *Science (80-. )*. **354**, 1004–1008 (2016).
- 467 4. Baril, A. A. *et al.* Biomarkers of dementia in obstructive sleep apnea. *Sleep Med. Rev.* **42**, 139–  
468 148 (2018).
- 469 5. Elias, A. *et al.* Risk of Alzheimer’s disease in obstructive sleep apnea syndrome: Amyloid- $\beta$   
470 and tau imaging. *J. Alzheimer’s Dis.* **66**, 733–741 (2018).
- 471 6. Mander, B. A. *et al.*  $\beta$ -amyloid disrupts human NREM slow waves and related hippocampus-  
472 dependent memory consolidation. *Nat. Neurosci.* **18**, 1051–1057 (2015).
- 473 7. Ju, Y. S. *et al.* Slow wave sleep disruption increases cerebrospinal fluid amyloid- $\beta$  levels.  
474 *Brain* **140**, 2104–2111 (2017).
- 475 8. Lucey, B. P. *et al.* Reduced non-rapid eye movement sleep is associated with tau pathology in  
476 early Alzheimer’s disease. *Sci. Transl. Med.* **11**, eaau6550 (2019).
- 477 9. Kang, J.-E. *et al.* Amyloid- $\beta$  dynamics are regulated by orexin and the sleep-wake cycle.  
478 *Science (80-. )*. **326**, 1005–1007 (2009).
- 479 10. Ju, Y. E. S. *et al.* Sleep quality and preclinical Alzheimer disease. *JAMA Neurol.* **70**, 587–593  
480 (2013).
- 481 11. Sprecher, K. E. *et al.* Poor sleep is associated with CSF biomarkers of amyloid pathology in  
482 cognitively normal adults. *Neurology* **89**, 445–453 (2017).
- 483 12. Lucey, B. P. *et al.* Effect of sleep on overnight cerebrospinal fluid amyloid  $\beta$  kinetics. *Ann.*  
484 *Neurol.* **83**, 197–204 (2018).
- 485 13. Ooms, S. *et al.* Effect of 1 night of total sleep deprivation on cerebrospinal fluid  $\beta$ -amyloid 42  
486 in healthy middle-aged men a randomized clinical trial. *JAMA Neurol.* **71**, 971–977 (2014).
- 487 14. Van Egroo, M. *et al.* Sleep-wake regulation and the hallmarks of the pathogenesis of  
488 Alzheimer’s disease. *Sleep* **42**, 1–13 (2019).
- 489 15. Ju, Y. E. S., Lucey, B. P. & Holtzman, D. M. Sleep and Alzheimer disease pathology-a  
490 bidirectional relationship. *Nat. Rev. Neurol.* **10**, 115–119 (2014).
- 491 16. Wang, C. & Holtzman, D. M. Bidirectional relationship between sleep and Alzheimer’s  
492 disease: role of amyloid, tau, and other factors. *Neuropsychopharmacology* (2019).  
493 doi:10.1038/s41386-019-0478-5
- 494 17. Ulrich, D. Sleep Spindles as Facilitators of Memory Formation and Learning. *Neural Plast.*  
495 **2016**, (2016).
- 496 18. Gais, S., Mölle, M., Helms, K. & Born, J. Learning-dependent increases in sleep spindle  
497 density. *J. Neurosci.* **22**, 6830–6834 (2002).
- 498 19. Schmidt, C. *et al.* Encoding difficulty promotes postlearning changes in sleep spindle activity  
499 during napping. *J. Neurosci.* **26**, 8976–8982 (2006).
- 500 20. Mednick, S. *et al.* The critical role of sleep spindles in hippocampal-dependent memory: a

- 501 pharmacology study. *J. Neurosci.* **33**, 4494–4504 (2013).
- 502 21. Miyamoto, D., Hirai, D. & Murayama, M. The roles of cortical slow waves in synaptic  
503 plasticity and memory consolidation. *Front. Neural Circuits* **11**, 1–8 (2017).
- 504 22. Helfrich, R. F., Mander, B. A., Jagust, W. J., Knight, R. T. & Walker, M. P. Old Brains Come  
505 Uncoupled in Sleep: Slow Wave-Spindle Synchrony, Brain Atrophy, and Forgetting. *Neuron*  
506 **97**, 221–230.e4 (2018).
- 507 23. Winer, J. R. *et al.* Sleep as a potential biomarker of tau and  $\beta$ -amyloid burden in the human  
508 brain Abbreviated Title Authors Center for Human Sleep Science , Department of Psychology ,  
509 University of California Berkeley , Department of Psychiatry and Human Behavior , Universit.  
510 (2019).
- 511 24. Winer, J. R. *et al.* Sleep Disturbance Forecasts  $\beta$ -Amyloid Accumulation across Subsequent  
512 Years. *Curr. Biol.* **30**, 4291–4298.e3 (2020).
- 513 25. Achermann, P. & Borbély, A. A. Low-frequency (< 1 Hz) oscillations in the human sleep  
514 electroencephalogram. *Neuroscience* **81**, 213–222 (1997).
- 515 26. Lee, J., Kim, D. & Shin, H. S. Lack of delta waves and sleep disturbances during non-rapid eye  
516 movement sleep in mice lacking  $\alpha$ 1G-subunit of T-type calcium channels. *Proc. Natl. Acad.*  
517 *Sci. U. S. A.* **101**, 18195–18199 (2004).
- 518 27. Hubbard, J. *et al.* Rapid fast-delta decay following prolonged wakefulness marks a phase of  
519 wake-inertia in NREM sleep. *Nat. Commun.* **11**, 1–16 (2020).
- 520 28. Bouchard, M. *et al.* Sleeping at the switch. *Elife* **10**, (2021).
- 521 29. Dang-Vu, T. T. *et al.* Cerebral correlates of delta waves during non-REM sleep revisited.  
522 *Neuroimage* **28**, 14–21 (2005).
- 523 30. Dang-Vu, T. T. *et al.* Functional neuroimaging insights into the physiology of human sleep.  
524 *Sleep* **33**, 1589–1603 (2010).
- 525 31. Saletin, J. M., van der Helm, E. & Walker, M. P. Structural brain correlates of human sleep  
526 oscillations. *Neuroimage* **83**, 658–668 (2013).
- 527 32. Stark, S. M., Yassa, M. A., Lacy, J. W. & Stark, C. E. L. A task to assess behavioral pattern  
528 separation (BPS) in humans: Data from healthy aging and mild cognitive impairment.  
529 *Neuropsychologia* **51**, 2442–2449 (2013).
- 530 33. Marks, S. M., Lockhart, S. N., Baker, S. L. & Jagust, W. J. Tau and  $\beta$ -amyloid are associated  
531 with medial temporal lobe structure, function, and memory encoding in normal aging. *J.*  
532 *Neurosci.* **37**, 3192–3201 (2017).
- 533 34. Grothe, M. J. *et al.* In vivo staging of regional amyloid deposition. *Neurology* **89**, 2031–2038  
534 (2017).
- 535 35. Achermann, P., Dijk, D. J., Brunner, D. P. & Borbély, A. A. A model of human sleep  
536 homeostasis based on EEG slow-wave activity: Quantitative comparison of data and  
537 simulations. *Brain Res. Bull.* **31**, 97–113 (1993).
- 538 36. Fernandez, L. M. J. & Lüthi, A. Sleep spindles: Mechanisms and functions. *Physiol. Rev.* **100**,  
539 805–868 (2020).
- 540 37. Adamantidis, A. R., Gutierrez Herrera, C. & Gent, T. C. Oscillating circuitries in the sleeping  
541 brain. *Nat. Rev. Neurosci.* **20**, 746–762 (2019).
- 542 38. Ju, Y.-E. S., Lucey, B. P. & Holtzman, D. M. Sleep and Alzheimer disease pathology - a  
543 bidirectional relationship. *Nat Rev Neurol* **10**, 115–9 (2015).

- 544 39. Xie, L. *et al.* Sleep drives metabolite clearance from the adult brain. *Science* (80-. ). **342**, 373–  
545 377 (2013).
- 546 40. Van Egroo, M. *et al.* Preserved wake-dependent cortical excitability dynamics predict cognitive  
547 fitness beyond age-related brain alterations. *Commun. Biol.* **2**, 1–10 (2019).
- 548 41. Chylinski, D. *et al.* Heterogeneity in the links between sleep arousals, amyloid-b, and  
549 cognition. *JCI Insight* **6**, e152858 (2021).
- 550 42. Mölle, M., Bergmann, T. O., Marshall, L. & Born, J. Fast and slow spindles during the sleep  
551 slow oscillation: Disparate coalescence and engagement in memory processing. *Sleep* **34**,  
552 1411–1421 (2011).
- 553 43. Rizzolo, L. *et al.* Relationship between brain AD biomarkers and episodic memory  
554 performance in healthy aging. *Brain Cogn.* **148**, (2021).
- 555 44. Berthomier, C. *et al.* Automatic Analysis of Single-Channel Sleep EEG : Validation in Healthy  
556 Individuals. *Sleep* **30**, 1587–1595 (2007).
- 557 45. Peter-Derex, L. *et al.* Automatic analysis of single-channel sleep EEG in a large spectrum of  
558 sleep disorders. *J. Clin. Sleep Med.* (2020). doi:<https://doi.org/10.5664/jcsm.8864>
- 559 46. Chylinski, D. *et al.* Validation of an Automatic Arousal Detection Algorithm for Whole-Night  
560 Sleep EEG Recordings. *Clocks & Sleep* **2**, 258–272 (2020).
- 561 47. Coppieters 't Wallant, D. *et al.* Automatic artifacts and arousals detection in whole-night sleep  
562 EEG recordings. *J. Neurosci. Methods* **258**, 124–133 (2016).
- 563 48. Rosinvil, T. *et al.* Are age and sex effects on sleep slow waves only a matter of EEG  
564 amplitude? *Sleep* 1–33 (2020). doi:10.1093/sleep/zsaa186
- 565 49. Gaudreault, P. O. *et al.* The association between white matter and sleep spindles differs in  
566 young and older individuals. *Sleep* **41**, 1–13 (2018).
- 567 50. Lafortune, M. *et al.* Sleep spindles and rapid eye movement sleep as predictors of next morning  
568 cognitive performance in healthy middle-aged and older participants. *J. Sleep Res.* **23**, 159–167  
569 (2014).
- 570 51. Martin, N. *et al.* Topography of age-related changes in sleep spindles. *Neurobiol. Aging* **34**,  
571 468–476 (2013).
- 572 52. Weiskopf, N. & Helms, G. Multi-parameter mapping of the human brain at 1mm resolution in  
573 less than 20 minutes. *Proc. Int. Soc. Magn. Reson. Med.* **16**, 2241 (2008).
- 574 53. Tabelow, K. *et al.* hMRI – A toolbox for quantitative MRI in neuroscience and clinical  
575 research. *Neuroimage* **194**, 191–210 (2019).
- 576 54. Ashburner, J. & Friston, K. J. Unified segmentation. *Neuroimage* **26**, 839–851 (2005).
- 577 55. Ashburner, J. A fast diffeomorphic image registration algorithm. *Neuroimage* **38**, 95–113  
578 (2007).
- 579 56. Tzourio-Mazoyer, N. *et al.* Automated anatomical labeling of activations in SPM using a  
580 macroscopic anatomical parcellation of the MNI MRI single-subject brain. *Neuroimage* **15**,  
581 273–289 (2002).
- 582 57. Klunk, W. E. *et al.* The Centiloid project: Standardizing quantitative amyloid plaque estimation  
583 by PET. *Alzheimer's Dement.* **11**, 1-15.e4 (2015).
- 584 58. Narbutas, J. *et al.* Associations between Cognitive Complaints, Memory Performance, Mood,  
585 and Amyloid- $\beta$  Accumulation in Healthy Amyloid Negative Late-Midlife Individuals. *J.*  
586 *Alzheimer's Dis.* **83**, 127–141 (2021).

- 587 59. Stark, S. M., Stevenson, R., Wu, C., Rutledge, S. & Stark, C. E. L. Stability of age-related  
588 deficits in the mnemonic similarity task across task variations. *Behav. Neurosci.* **129**, 257–268  
589 (2015).
- 590 60. Jaeger, B. C., Edwards, L. J., Das, K. & Sen, P. K. An R<sup>2</sup> statistic for fixed effects in the  
591 generalized linear mixed model. *J. Appl. Stat.* **44**, 1086–1105 (2017).
- 592 61. Kain, M. P., Bolker, B. M. & McCoy, M. W. A practical guide and power analysis for  
593 GLMMs: Detecting among treatment variation in random effects. *PeerJ* **2015**, (2015).
- 594 62. Faul, F., Erdfelder, E., Buchner, A. & Lang, A. G. Statistical power analyses using G\*Power  
595 3.1: Tests for correlation and regression analyses. *Behav. Res. Methods* **41**, 1149–1160 (2009).
- 596
